# Supplementary material
Source: publisher site journal article supplement (https://www.dovepress.com/article/405585)
Supplement: Supplementary file 1 [file get_supplementary_file.php]

**Supplement**

**Supplementary table 1:** Codes used to describe medication at baseline

| **Drug class** | **ATC-Code** |
| --- | --- |
| Antiplatelets | B01AC*, C07FX02, C07FX03, C07FX04, C10BX01, C10BX02, C10BX04, C10BX05, C10BX06, C10BX08, C10BX12, N02BA01 |
| NSAIDs | M01A*, N02BA01, N02BA51, N02BA71, R05XA02, C01EB03, C01EB16, G02CC01, G02CC02, M01BA03, N02AJ02, N02AJ05, N02AJ07, N02AJ08, N02AJ18, N02AJ19, N02BA13, R01BA57, R02AX02, R05XA10, R05XA22 |
| Oral corticosteroids | H02* |
| Antiarrhythmic agents | C08*, C01B*, C07AB*, C07AG*, C01A*, C01EB17, C07FX05, C07FX06, C09BB10 |
| SSRIs | N06AB*, N06AX* |
| PPIs | A02BC*, A02BD* |

* Including all subcodes

**Abbreviations:** NSAID, nonsteroidal anti-inflammatory drug; SSRI, selective serotonin reuptake inhibitor; PPI, proton pump inhibitor.

**Supplementary table 2:** Description of codes and algorithms used to describe comorbidity

| **Medical condition** | **ICD-10-GM Codes** | **Algorithm** (assessed on a yearly basis for each year before the index date) |
| --- | --- | --- |
| Ischemic stroke | I63x-164, I69.3, I69.4 | At least one inpatient diagnosis OR  at least one outpatient diagnosis AND  at least one dispensation of an antiplatelet *[see ATC codes listed in supplementary table 1]* OR an oral anticoagulant *[B01AA*, B01AE*, B01AF*]* in the same quarter as the outpatient diagnosis  in the respective time period. |
| TIA | G450x, G451x, G452x, G453x, G458x, G459x; | At least one inpatient diagnosis OR  at least one outpatient diagnosis AND  at least one dispensation of an antiplatelet *[see ATC codes listed in supplementary table 1]* OR an oral anticoagulant *[B01AA*, B01AE*, B01AF*]* in the same quarter as the outpatient diagnosis  in the respective time period. |
| Embolism venous | I26.-, I801, I80.2x, I80.3, I80.81, I80.88, I80.9, I81, I82.0, I82.2, I82.3, I82.8x, I82.9; | At least one inpatient diagnosis OR  at least one outpatient diagnosis AND at least one dispensation of an OAC *[B01AA*, B01AE*, B01AF*]* in the same quarter as the outpatient diagnosis  in the respective time period. |
| Coronary heart disease | I20x-I25x | At least one inpatient diagnosis OR  at least one inpatient operation or procedure code indicating treatment of the heart during a hospitalization *[OPS codes: 5360, 5361, 5362, 5363, 12755, 88371, 88372, 88375, 88376, 88378, 88399, 88370, 8837e, 8837k, 8837m, 8837p, 8837q, 8837t, 8837u, 8837v, 8837w, 8839a, 8839a, 883d]* OR  at least one outpatient diagnosis in three different quarters of the four quarters AND dispensations of at least 50 DDDs of either antiplatelets *[B01AC*]* OR nitrates *[C01DA*, C01DX11, C01DX12]* OR beta-blockers *[C07 *]* OR calcium channel blockers *[C08*, C09XA53, C09XA54]* OR angiotensin-converting enzyme inhibitors *[C09A*, C09B*]* OR angiotensin II receptor blockers *[C09C*, C09D*]* or lipid modifying agents *[C10AA*, C10AB*, C10AC*, C10AD*, C10AX01, C10AX02, C10AX03, C10AX05, C10AX06, C10AX07, C10AX08, C10AX09, C10AX11, C10AX12, C10AX13, C10AX14, C10AX15, C10AX18, C10AX19, C10AX21, C10BA*, C10BB*, C10BE*, C10BX*)* |
| Hypertension | I10x-I15x | At least one in- or outpatient diagnosis AND dispensations with at least 180 DDDs of a type of drug used for the treatment, ie either 180 DDDs of antihypertensive drugs *[C02*]*, OR 180 DDDs of diuretics *[C03*]* OR 180 DDDs of betablockers *[C07*]* OR 180 DDDs of calcium channel blockers *[C08*]* OR 180 DDDs of angiotensin-converting enzyme inhibitors and angiotensin-II receptor blockers *[C09*]* |
| Congestive heart failure | I11.0x, I13.0x, I13.2x, I50.x | At least one inpatient diagnosis OR  at least one outpatient diagnosis (same three-digit ICD-Code) in three different quarters out of four quarters AND  dispensations of at least 50 DDDs of either cardiac glycosides *[C01A *]* OR diuretics *[C03*]* OR beta-blockers *[C07*]* OR angiotensin-converting enzyme inhibitors *[C09A*, C09B*]* OR angiotensin II receptor antagonists *[C09C*, C09D*]*) |
| Vascular disease | I20x-I25x, I70x-I72x, | At least one inpatient diagnosis OR  at least one outpatient diagnosis AND at least one dispensation of an antiplatelet *[see antiplatelets in supplementary table 1]* in the respective quarter. |
| Diabetes | E10x -E14x | At least one in- OR outpatient diagnosis of diabetes mellitus AND at least dispensations of 90 DDDs in sum of an antidiabetic drug *[A10A*, A10B*, A10X*]* |
| Renal disease | I120x - I131x, I32x, I31x, N17x, N18x, N19, N99.0, O084, O102, O103, O904, P960, Z49, Z7560, Z7564, Z7570, Z7574, Z940, Z992 | At least one inpatient operation or procedure *[OPS codes: 8-853, 8-854, 8-855, 8-857, 8-85a]* OR at least one treatment *[ebm codes: 4562, 4563, 4564, 4565, 13600, 13602, 13610, 13611, 40700, 40701, 40702, 40720, 40800, 40801, 40802, 40803, 40804, 40805, 40806, 40807, 40808, 40815, 40816, 40817, 40818, 40819, 40820, 40821, 40822, 40823, 40824, 40825, 40826, 40827, 40828]* for dialysis OR  at least one inpatient diagnosis OR at least one outpatient diagnosis in at least two different quarters out of four quarters  in the respective time period. |
| Liver disease | K70x, K71x, K72x, K73x, K74x, K75x, K76x, K77x, Z944 | At least one inpatient diagnosis OR  at least one outpatient diagnosis in at least two different quarters out of four quarters  in the respective time period. |
| Major bleeding | D62, H922, H113, H210, H313, H356, H431, H450, I850, I983, K226, K2281, K250, K252, K254, K256, K260, K262, K264, K266, K270, K272, K274, K276, K280, K282, K284, K286, K290, K3182, K5522, K5532, K5582, K5701, K5703, K5711, K5713, K5721, K5723, K5731, K5733, K5741, K5743, K5751, K5753, K5781, K5783, K5791, K5793, K625, K661, K920, K921, K922, I60x, I61x, I62x, I690, I691, I692, S0633, S0634, S064, S065, S066, I312, M250x, M2500, M2501, M2502, M2503, M2504, M2505, M2506, M2507, M2508, M2509, R233, R58, R04x, J942, N02x, N421, N836, N837, N857, N897, N920, N921, N923, N924, N93x, N950, R31, S314 | At least one inpatient diagnosis can be identified in the respective time period. |
| Intracranial bleeding | I60x, I61x, I62x, I690, I691, I692, S0633, S0634, S064, S065, S066 | At least one inpatient diagnosis can be identified in the respective time period. |
| Gastrointestinal bleeding | I850, I983, K226, K2281, K250, K252, K254, K256, K260, K262, K264, K266, K270, K272, K274, K276, K280, K282, K284, K286, K290, K3182, K5522, K5532, K5582, K5701, K5703, K5711, K5713, K5721, K5723, K5731, K5733, K5741, K5743, K5751, K5753, K5781, K5783, K5791, K5793, K625, K661, K920, K921, K922 | At least one inpatient diagnosis can be identified in the respective time period. |

* Including all subcodes

**Abbreviations:** DDD, defined daily dose; TIA, transient ischemic attack.

**Supplementary table 3:** Description of the score components for the calculation of the CHA2DS2-VASc Score

|  | CHA2DS2-VASc criteria | Score in  points |
| --- | --- | --- |
| C | Congestive heart failure or left ventricle dysfunction | 1 |
| H | Hypertension | 1 |
| A2 | Age ≥ 75 | 2 |
| D | Diabetes mellitus | 1 |
| S2 | Stroke/transient ischaemic attack | 2 |
| V | Vascular disease (prior myocardial infarction, peripheral artery disease, or aortic plaque) | 1 |
| A | Age 65–74 years | 1 |
| Sc | Femalea | 1 |
| Total Score | | 0–9 |

a If no other risk factors are present, female sex scores 0.

**Supplementary table 4:** Description of the score components for the calculation of the HAS-BLED Score

|  | HAS-BLED criteria | Score in  points |
| --- | --- | --- |
| H | Uncontrolled hypertension (systolic blood pressure > 160 mmHg)a | 1 |
| A | Abnormal renal or liver function  Renal: chronic dialysis, renal transplant, serum creatinine ≥ 2.3 mg/dL (200 µmol/L)b  Liver: cirrhosis, bilirubin > 2 x UNL with AST/ALT/AP > 3 x UNLc | 1  1 |
| S | Previous stroke | 1 |
| B | Bleeding history or predisposition (anaemia) | 1 |
| L | Labile INR (therapeutic time in range < 60%)d | – |
| E | Elderly (> 65 years) | 1 |
| D | Drugs or alcohol  Drugs: antiplatelet agents or NSAIDse  Alcoholf | 1  1 |
| Total score | | 0–8 |

a Based on medical condition of hypertension

b Based on medical condition of renal disease

c Based on medical condition of liver disease

d INR is not captured in GePaRD

e Assessed in the 12 months before the index date

f Based on diagnoses indicating alcohol abuse

**Abbreviations:** ALT, alanine transaminase; AP, alkaline phosphatase; AST, aspartate transaminase; INR, international normalized ratio; NSAIDs, nonsteroidal anti-inflammatory drugs; UNL, upper limit of normal.

**Supplementary table 5a:** Baseline characteristics of new phenprocoumon users, stratified by year of index date

|  | **2011a N=12,943** | **2012 N=27,350** | **2013 N=21,651** | **2014 N=18,423** | **2015 N=14,882** | **2016 N=10,226** | **2017 N=6,284** | **2018 N=3,675** | **2019 N=2,683** |
| --- | --- | --- | --- | --- | --- | --- | --- | --- | --- |
| **Sex** | | | | | | | | | | |
| Male, N (%) | 6,754 (52.2) | 14,123 (51.6) | 11,413 (52.7) | 9,710 (52.7) | 8,016 (53.9) | 5,558 (54.4) | 3,450 (54.9) | 2,009 (54.7) | 1,536 (57.2) |
| **Age (years)** | | | | | | | | | | |
| Mean (SD) | 72.4 (9.8) | 73.3 (9.6) | 73.8 (9.5) | 74.3 (9.3) | 74.3 (9.5) | 74.5 (9.7) | 74.4 (9.9) | 73.7 (10.6) | 73.0 (11.0) |
| Median (Q1-Q3) | 73.0 (68-79) | 74.0 (68-80) | 75.0 (69-80) | 75.0 (69-80) | 76.0 (69-80) | 76.0 (69-81) | 76.0 (69-81) | 76.0 (67-81) | 75.0 (66-81) |
| **Age categories (years)** | | | | | | | | | | |
| 65-74, N (%) | 4,972 (38.4) | 9,938 (36.3) | 7,333 (33.9) | 5,865 (31.8) | 4,423 (29.7) | 2,825 (27.6) | 1,685 (26.8) | 989 (26.9) | 731 (27.2) |
| 75+, N (%) | 5,647 (43.6) | 13,064 (47.8) | 10,996 (50.8) | 9,910 (53.8) | 8,292 (55.7) | 5,895 (57.6) | 3,624 (57.7) | 2,021 (55.0) | 1,386 (51.7) |
| **Number of hospital visits in the year prior to index date** | | | | | | | | | | |
| Median (Q1-Q3) | 1.0 (1-2) | 1.0 (1-2) | 1.0 (0-2) | 1.0 (1-2) | 1.0 (1-2) | 1.0 (0-2) | 1.0 (1-2) | 1.0 (0-3) | 1.0 (1-3) |
| **Days spent in hospital in the year prior to index date** | | | | | | | | | | |
| Median (Q1-Q3) | 8.0 (1-17) | 8.0 (1-17) | 8.0 (0-18) | 8.0 (1-19) | 8.0 (1-19) | 9.0 (0-20) | 9.0 (1-22) | 11.0 (0-28) | 13.0 (1-30) |
| **Look-back period in years** | | | | | | | | | | |
| Mean (SD) | 6.6 (1.4) | 7.4 (1.7) | 7.9 (2.5) | 8.9 (2.5) | 9.8 (2.6) | 10.9 (2.6) | 11.6 (3.0) | 12.5 (3.1) | 13.4 (3.4) |
| Median (Q1-Q3) | 7.0 (7-7) | 8.0 (8-8) | 9.0 (9-9) | 10.0 (10-10) | 11.0 (11-11) | 12.0 (12-12) | 13.0 (13-13) | 14.0 (14-14) | 15.0 (14-15) |
| **Selected medical history any time before index date** | | | | | | | | | | |
| Ischemic stroke,  N (%) | 1,112 (8.6) | 2,437 (8.9) | 1,922 (8.9) | 1,705 (9.3) | 1,444 (9.7) | 1,040 (10.2) | 620 (9.9) | 361 (9.8) | 272 (10.1) |
| TIA, N (%) | 584 (4.5) | 1,262 (4.6) | 1,022 (4.7) | 921 (5.0) | 799 (5.4) | 553 (5.4) | 297 (4.7) | 184 (5.0) | 132 (4.9) |
| Embolism, N (%) | 197 (1.5) | 503 (1.8) | 413 (1.9) | 359 (1.9) | 298 (2.0) | 163 (1.6) | 116 (1.8) | 69 (1.9) | 65 (2.4) |
| Coronary heart disease, N (%) | 4,131 (31.9) | 8,956 (32.7) | 7,378 (34.1) | 6,321 (34.3) | 5,274 (35.4) | 3,549 (34.7) | 2,187 (34.8) | 1,272 (34.6) | 863 (32.2) |
| Hypertension,  N (%) | 9,750 (75.3) | 20,964 (76.7) | 16,799 (77.6) | 14,464 (78.5) | 11,643 (78.2) | 8,081 (79.0) | 4,981 (79.3) | 2,880 (78.4) | 2,065 (77.0) |
| Congestive heart failure, N (%) | 2,066 (16.0) | 4,560 (16.7) | 3,883 (17.9) | 3,397 (18.4) | 2,727 (18.3) | 2,045 (20.0) | 1,260 (20.1) | 819 (22.3) | 554 (20.6) |
| Vascular disease,  N (%) | 4,462 (34.5) | 9,841 (36.0) | 7,965 (36.8) | 7,087 (38.5) | 6,014 (40.4) | 4,152 (40.6) | 2,608 (41.5) | 1,566 (42.6) | 1,119 (41.7) |
| Diabetes, N (%) | 2,215 (17.1) | 4,809 (17.6) | 4,082 (18.9) | 3,627 (19.7) | 3,013 (20.2) | 2,113 (20.7) | 1,326 (21.1) | 770 (21.0) | 573 (21.4) |
| Renal disease,  N (%) | 2,255 (17.4) | 5,396 (19.7) | 4,807 (22.2) | 4,576 (24.8) | 4,091 (27.5) | 3,017 (29.5) | 2,119 (33.7) | 1,325 (36.1) | 972 (36.2) |
| Liver disease,  N (%) | 2,323 (17.9) | 4,994 (18.3) | 4,251 (19.6) | 3,715 (20.2) | 3,182 (21.4) | 2,281 (22.3) | 1,413 (22.5) | 851 (23.2) | 647 (24.1) |
| Major bleeding,  N (%) | 2,187 (16.9) | 4,967 (18.2) | 4,333 (20.0) | 4,085 (22.2) | 3,636 (24.4) | 2,650 (25.9) | 1,832 (29.2) | 1,185 (32.2) | 936 (34.9) |
| Intracranial bleeding,  N (%) | 92 (0.7) | 224 (0.8) | 207 (1.0) | 176 (1.0) | 187 (1.3) | 117 (1.1) | 104 (1.7) | 58 (1.6) | 52 (1.9) |
| Gastrointestinal bleeding,  N (%) | 471 (3.6) | 1,211 (4.4) | 1,044 (4.8) | 983 (5.3) | 860 (5.8) | 594 (5.8) | 403 (6.4) | 243 (6.6) | 162 (6.0) |
| **Selected medication dispensed within one year before or at index date N (%)** | | | | | | | | | | |
| Antiplatelets,  N (%) | 2,838 (21.9) | 6,041 (22.1) | 4,889 (22.6) | 4,340 (23.6) | 3,557 (23.9) | 2,468 (24.1) | 1,481 (23.6) | 871 (23.7) | 628 (23.4) |
| NSAIDs, N (%) | 4,886 (37.8) | 10,082 (36.9) | 7,717 (35.6) | 6,326 (34.3) | 5,011 (33.7) | 3,387 (33.1) | 1,909 (30.4) | 1,037 (28.2) | 781 (29.1) |
| Antiarrhythmic agents, N (%) | 9,622 (74.3) | 20,429 (74.7) | 15,938 (73.6) | 13,377 (72.6) | 10,617 (71.3) | 7,247 (70.9) | 4,432 (70.5) | 2,553 (69.5) | 1,812 (67.5) |
| Corticosteroids,  N (%) | 1,606 (12.4) | 3,336 (12.2) | 2,726 (12.6) | 2,279 (12.4) | 1,987 (13.4) | 1,389 (13.6) | 841 (13.4) | 446 (12.1) | 334 (12.4) |
| SSRI, N (%) | 875 (6.8) | 1,930 (7.1) | 1,529 (7.1) | 1,384 (7.5) | 1,133 (7.6) | 806 (7.9) | 473 (7.5) | 288 (7.8) | 205 (7.6) |
| PPI, N (%) | 4,212 (32.5) | 9,320 (34.1) | 7,823 (36.1) | 6,783 (36.8) | 5,634 (37.9) | 3,908 (38.2) | 2,286 (36.4) | 1,295 (35.2) | 906 (33.8) |
| **CHA2DS2VASc score b** | | | | | | | | | | |
| Mean (SD) | 3.5 (1.8) | 3.6 (1.8) | 3.7 (1.8) | 3.8 (1.8) | 3.8 (1.8) | 3.9 (1.8) | 3.9 (1.9) | 3.9 (1.9) | 3.8 (1.9) |
| Median (Q1-Q3) | 3.0 (2-5) | 4.0 (2-5) | 4.0 (2-5) | 4.0 (3-5) | 4.0 (3-5) | 4.0 (3-5) | 4.0 (3-5) | 4.0 (3-5) | 4.0 (3-5) |
| **Modified HAS-BLED scoreb** | | | | | | | | | | |
| Mean (SD) | 2.8 (1.3) | 2.8 (1.4) | 2.9 (1.4) | 3.0 (1.4) | 3.1 (1.4) | 3.1 (1.4) | 3.2 (1.5) | 3.2 (1.5) | 3.2 (1.5) |
| Median (Q1-Q3) | 3.0 (2-4) | 3.0 (2-4) | 3.0 (2-4) | 3.0 (2-4) | 3.0 (2-4) | 3.0 (2-4) | 3.0 (2-4) | 3.0 (2-4) | 3.0 (2-4) |
| a Year 2011 only includes data from August 2011 onwards (beginning of the study period)  b Further details are described in the supplementary tables 3-4  **Abbreviations:** OAC, oral anticoagulant; IQR, Interquartile range; SD, standard deviation; TIA, transient ischemic attack; NSAID, nonsteroidal anti-inflammatory drug; PPI, proton pump inhibitor; SSRI, selective serotonin reuptake inhibitor. | | | | | | | | | | |

**Supplementary table 5b:** Baseline characteristics of new dabigatran users, stratified by year of index date

|  | **2011a N=2,117** | **2012 N=6,012** | **2013 N=5,956** | **2014 N=3,850** | **2015 N=2,946** | **2016 N=3,140** | **2017 N=2,702** | **2018 N=2,199** | **2019 N=1,564** |
| --- | --- | --- | --- | --- | --- | --- | --- | --- | --- |
| **Sex** | | | | | | | | | |
| Male, N (%) | 1,085 (51.3) | 3,089 (51.4) | 3,043 (51.1) | 2,020 (52.5) | 1,581 (53.7) | 1,692 (53.9) | 1,437 (53.2) | 1,191 (54.2) | 836 (53.5) |
| **Age (years)** | | | | | | | | | |
| Mean (SD) | 73.1 (10.9) | 72.4 (10.9) | 72.7 (11.0) | 72.8 (10.8) | 72.8 (10.6) | 73.0 (10.5) | 73.4 (10.9) | 72.8 (11.3) | 73.1 (11.2) |
| Median (Q1-Q3) | 74.0 (68-81) | 73.0 (67-80) | 74.0 (67-80) | 74.0 (67-80) | 74.0 (67-80) | 75.0 (67-80) | 75.0 (68-81) | 75.0 (66-81) | 75.0 (66-82) |
| **Age categories (years)** | | | | | | | | | |
| 65-74, N (%) | 730 (34.5) | 2,093 (34.8) | 1,978 (33.2) | 1,233 (32.0) | 906 (30.8) | 935 (29.8) | 761 (28.2) | 574 (26.1) | 429 (27.4) |
| 75+, N (%) | 1,013 (47.9) | 2,707 (45.0) | 2,780 (46.7) | 1,864 (48.4) | 1,453 (49.3) | 1,616 (51.5) | 1,439 (53.3) | 1,141 (51.9) | 796 (50.9) |
| **Number of hospital visits in the year prior to index date** | | | | | | | | | |
| Median (Q1-Q3) | 1.0 (1-2) | 1.0 (1-2) | 1.0 (1-2) | 1.0 (1-2) | 1.0 (0-2) | 1.0 (1-2) | 1.0 (1-2) | 1.0 (1-2) | 1.0 (1-2) |
| **Days spent in hospital in the year prior to index date** | | | | | | | | | |
| Median (Q1-Q3) | 7.0 (1-15) | 7.0 (2-16) | 6.0 (2-14) | 6.0 (1-14) | 6.0 (0-13) | 7.0 (2-14) | 7.0 (2-15) | 8.0 (3-20) | 8.0 (4-20) |
| **Look-back period in years** | | | | | | | | | |
| Mean (SD) | 6.6 (1.4) | 7.4 (1.7) | 7.9 (2.5) | 8.8 (2.6) | 9.7 (2.7) | 10.7 (2.8) | 11.5 (3.2) | 12.4 (3.2) | 13.4 (3.3) |
| Median (Q1-Q3) | 7.0 (7-7) | 8.0 (8-8) | 9.0 (9-9) | 10.0 (10-10) | 11.0 (11-11) | 12.0 (12-12) | 13.0 (13-13) | 14.0 (13-14) | 15.0 (14-15) |
| **Selected medical history any time before index date** | | | | | | | | | |
| Ischemic stroke,  N (%) | 252 (11.9) | 770 (12.8) | 722 (12.1) | 479 (12.4) | 363 (12.3) | 369 (11.8) | 380 (14.1) | 370 (16.8) | 261 (16.7) |
| TIA, N (%) | 127 (6.0) | 325 (5.4) | 330 (5.5) | 214 (5.6) | 153 (5.2) | 153 (4.9) | 167 (6.2) | 125 (5.7) | 110 (7.0) |
| Embolism, N (%) | 33 (1.6) | 59 (1.0) | 56 (0.9) | 45 (1.2) | 39 (1.3) | 33 (1.1) | 43 (1.6) | 41 (1.9) | 25 (1.6) |
| Coronary heart disease, N (%) | 686 (32.4) | 1,792 (29.8) | 1,712 (28.7) | 1,083 (28.1) | 872 (29.6) | 897 (28.6) | 744 (27.5) | 614 (27.9) | 402 (25.7) |
| Hypertension,  N (%) | 1,577 (74.5) | 4,316 (71.8) | 4,266 (71.6) | 2,821 (73.3) | 2,163 (73.4) | 2,307 (73.5) | 1,962 (72.6) | 1,592 (72.4) | 1,119 (71.5) |
| Congestive heart failure, N (%) | 386 (18.2) | 948 (15.8) | 861 (14.5) | 571 (14.8) | 413 (14.0) | 443 (14.1) | 376 (13.9) | 280 (12.7) | 195 (12.5) |
| Vascular disease,  N (%) | 760 (35.9) | 1,966 (32.7) | 1,870 (31.4) | 1,207 (31.4) | 952 (32.3) | 1,013 (32.3) | 877 (32.5) | 757 (34.4) | 469 (30.0) |
| Diabetes, N (%) | 317 (15.0) | 886 (14.7) | 831 (14.0) | 602 (15.6) | 465 (15.8) | 504 (16.1) | 424 (15.7) | 349 (15.9) | 221 (14.1) |
| Renal disease,  N (%) | 348 (16.4) | 824 (13.7) | 851 (14.3) | 648 (16.8) | 440 (14.9) | 577 (18.4) | 473 (17.5) | 439 (20.0) | 318 (20.3) |
| Liver disease,  N (%) | 380 (17.9) | 1,046 (17.4) | 1,064 (17.9) | 734 (19.1) | 562 (19.1) | 626 (19.9) | 542 (20.1) | 504 (22.9) | 340 (21.7) |
| Major bleeding,  N (%) | 389 (18.4) | 1,003 (16.7) | 963 (16.2) | 665 (17.3) | 497 (16.9) | 581 (18.5) | 578 (21.4) | 485 (22.1) | 383 (24.5) |
| Intracranial bleeding, N (%) | 41 (1.9) | 107 (1.8) | 96 (1.6) | 66 (1.7) | 45 (1.5) | 81 (2.6) | 106 (3.9) | 76 (3.5) | 82 (5.2) |
| Gastrointestinal bleeding, N (%) | 97 (4.6) | 286 (4.8) | 258 (4.3) | 166 (4.3) | 134 (4.5) | 164 (5.2) | 160 (5.9) | 144 (6.5) | 97 (6.2) |
| **Selected medication dispensed within one year before index date** | | | | | | | | | |
| Antiplatelets,  N (%) | 527 (24.9) | 1,308 (21.8) | 1,138 (19.1) | 730 (19.0) | 589 (20.0) | 611 (19.5) | 504 (18.7) | 439 (20.0) | 290 (18.5) |
| NSAIDs, N (%) | 744 (35.1) | 2,100 (34.9) | 2,168 (36.4) | 1,344 (34.9) | 992 (33.7) | 1,047 (33.3) | 872 (32.3) | 682 (31.0) | 454 (29.0) |
| Antiarrhythmic agents, N (%) | 1,619 (76.5) | 4,350 (72.4) | 4,237 (71.1) | 2,716 (70.5) | 2,035 (69.1) | 2,075 (66.1) | 1,781 (65.9) | 1,370 (62.3) | 962 (61.5) |
| Corticosteroids  N (%) | 258 (12.2) | 683 (11.4) | 689 (11.6) | 471 (12.2) | 349 (11.8) | 364 (11.6) | 324 (12.0) | 268 (12.2) | 186 (11.9) |
| SSRI, N (%) | 143 (6.8) | 496 (8.3) | 432 (7.3) | 287 (7.5) | 215 (7.3) | 218 (6.9) | 231 (8.5) | 170 (7.7) | 150 (9.6) |
| PPI, N (%) | 711 (33.6) | 2,022 (33.6) | 2,093 (35.1) | 1,324 (34.4) | 1,000 (33.9) | 1,136 (36.2) | 937 (34.7) | 742 (33.7) | 466 (29.8) |
| **CHA2DS2VASc scoreb** | | | | | | | | | |
| Mean (SD) | 3.6 (1.9) | 3.5 (2.0) | 3.4 (1.9) | 3.5 (1.9) | 3.5 (1.9) | 3.5 (1.9) | 3.6 (1.9) | 3.6 (2.0) | 3.6 (2.0) |
| Median (Q1-Q3) | 4.0 (2-5) | 3.0 (2-5) | 3.0 (2-5) | 3.0 (2-5) | 3.0 (2-5) | 4.0 (2-5) | 4.0 (2-5) | 4.0 (2-5) | 4.0 (2-5) |
| **Modified HAS-BLED scoreb** | | | | | | | | | |
| Mean (SD) | 2.8 (1.4) | 2.7 (1.4) | 2.7 (1.4) | 2.7 (1.4) | 2.7 (1.4) | 2.8 (1.5) | 2.8 (1.5) | 2.9 (1.5) | 2.9 (1.5) |
| Median (Q1-Q3) | 3.0 (2-4) | 3.0 (2-4) | 3.0 (2-4) | 3.0 (2-4) | 3.0 (2-4) | 3.0 (2-4) | 3.0 (2-4) | 3.0 (2-4) | 3.0 (2-4) |

a Year 2011 only includes data from August 2011 onwards (beginning of the study period)

b Further details are described in the supplementary tables 3-4

**Abbreviations:** OAC, oral anticoagulant; IQR, Interquartile range; SD, standard deviation; TIA, transient ischemic attack; NSAID, nonsteroidal anti-inflammatory drug; PPI, proton pump inhibitor; SSRI, selective serotonin reuptake inhibitor.

**Supplementary table 5c:** Baseline characteristics of new rivaroxaban users, stratified by year of index date

|  | **2011a/12 N=9,470** | **2013 N=20,745** | **2014 N=21,519** | **2015 N=21,328** | **2016 N=16,985** | **2017 N=14,535** | **2018 N=14,213** | **2019 N=12,202** |
| --- | --- | --- | --- | --- | --- | --- | --- | --- |
| **Sex** | | | | | | | | |
| Male, N (%) | 4,785 (50.5) | 10,475 (50.5) | 10,864 (50.5) | 11,028 (51.7) | 8,908 (52.4) | 7,886 (54.3) | 7,771 (54.7) | 6,615 (54.2) |
| **Age (years)** | | | | | | | | |
| Mean (SD) | 73.5 (10.5) | 73.2 (10.9) | 72.9 (11.0) | 72.7 (11.1) | 72.4 (11.2) | 72.8 (11.2) | 72.8 (11.3) | 72.6 (11.5) |
| Median (Q1-Q3) | 74.0 (68-81) | 74.0 (68-81) | 74.0 (67-80) | 74.0 (66-80) | 74.0 (66-80) | 75.0 (66-80) | 75.0 (66-81) | 75.0 (66-81) |
| **Age categories (years)** | | | | | | | | |
| 65-74, N (%) | 3,245 (34.3) | 6,681 (32.2) | 6,711 (31.2) | 6,246 (29.3) | 4,837 (28.5) | 4,030 (27.7) | 3,792 (26.7) | 3,221 (26.4) |
| 75+, N (%) | 4,581 (48.4) | 10,161 (49.0) | 10,556 (49.1) | 10,613 (49.8) | 8,487 (50.0) | 7,443 (51.2) | 7,309 (51.4) | 6,259 (51.3) |
| **Number of hospital visits in the year prior to index date** | | | | | | | | |
| Median (Q1-Q3) | 1.0 (1-2) | 1.0 (1-2) | 1.0 (1-2) | 1.0 (1-2) | 1.0 (1-2) | 1.0 (1-2) | 1.0 (1-2) | 1.0 (1-2) |
| **Days spent in hospital in the year prior to index date** | | | | | | | | |
| Median (Q1-Q3) | 7.0 (1-16) | 6.0 (1-16) | 6.0 (1-15) | 6.0 (1-14) | 6.0 (2-14) | 6.0 (2-15) | 6.0 (2-15) | 6.0 (1-15) |
| **Look-back period in years** | | | | | | | | |
| Mean (SD) | 7.4 (1.7) | 7.9 (2.5) | 8.8 (2.6) | 9.7 (2.7) | 10.6 (2.9) | 11.4 (3.1) | 12.3 (3.3) | 13.2 (3.5) |
| Median (Q1-Q3) | 8.0 (8-8) | 9.0 (9-9) | 10.0 (10-10) | 11.0 (11-11) | 12.0 (12-12) | 13.0 (13-13) | 14.0 (13-14) | 15.0 (14-15) |
| **Selected medical history any time before index date** | | | | | | | | |
| Ischemic stroke,  N (%) | 1,030 (10.9) | 1,898 (9.1) | 1,919 (8.9) | 1,783 (8.4) | 1,384 (8.1) | 1,215 (8.4) | 1,171 (8.2) | 991 (8.1) |
| TIA, N (%) | 519 (5.5) | 948 (4.6) | 969 (4.5) | 958 (4.5) | 770 (4.5) | 653 (4.5) | 644 (4.5) | 570 (4.7) |
| Embolism, N (%) | 210 (2.2) | 393 (1.9) | 402 (1.9) | 391 (1.8) | 294 (1.7) | 262 (1.8) | 272 (1.9) | 243 (2.0) |
| Coronary heart disease, N (%) | 2,937 (31.0) | 6,092 (29.4) | 5,975 (27.8) | 5,806 (27.2) | 4,573 (26.9) | 4,048 (27.9) | 4,081 (28.7) | 3,402 (27.9) |
| Hypertension,  N (%) | 7,086 (74.8) | 15,224 (73.4) | 15,812 (73.5) | 15,426 (72.3) | 12,102 (71.3) | 10,498 (72.2) | 10,239 (72.0) | 8,857 (72.6) |
| Congestive heart failure, N (%) | 1,651 (17.4) | 3,394 (16.4) | 3,331 (15.5) | 3,186 (14.9) | 2,432 (14.3) | 2,158 (14.8) | 2,035 (14.3) | 1,822 (14.9) |
| Vascular disease,  N (%) | 3,280 (34.6) | 6,683 (32.2) | 6,633 (30.8) | 6,478 (30.4) | 5,234 (30.8) | 4,704 (32.4) | 4,682 (32.9) | 3,999 (32.8) |
| Diabetes, N (%) | 1,548 (16.3) | 3,333 (16.1) | 3,428 (15.9) | 3,284 (15.4) | 2,769 (16.3) | 2,450 (16.9) | 2,392 (16.8) | 2,139 (17.5) |
| Renal disease,  N (%) | 1,763 (18.6) | 3,693 (17.8) | 3,883 (18.0) | 3,872 (18.2) | 3,221 (19.0) | 3,050 (21.0) | 3,144 (22.1) | 2,815 (23.1) |
| Liver disease,  N (%) | 1,753 (18.5) | 3,777 (18.2) | 4,115 (19.1) | 4,017 (18.8) | 3,319 (19.5) | 2,943 (20.2) | 2,951 (20.8) | 2,705 (22.2) |
| Major bleeding,  N (%) | 1,780 (18.8) | 3,659 (17.6) | 3,956 (18.4) | 4,000 (18.8) | 3,229 (19.0) | 2,988 (20.6) | 2,994 (21.1) | 2,538 (20.8) |
| Intracranial  bleeding, N (%) | 131 (1.4) | 261 (1.3) | 261 (1.2) | 288 (1.4) | 197 (1.2) | 193 (1.3) | 209 (1.5) | 174 (1.4) |
| Gastrointestinal bleeding, N (%) | 460 (4.9) | 922 (4.4) | 1,041 (4.8) | 993 (4.7) | 814 (4.8) | 743 (5.1) | 755 (5.3) | 662 (5.4) |
| **Selected medication dispensed within one year before index date** | | | | | | | | |
| Antiplatelets,  N (%) | 2,100 (22.2) | 4,045 (19.5) | 3,988 (18.5) | 3,649 (17.1) | 2,875 (16.9) | 2,624 (18.1) | 2,629 (18.5) | 2,266 (18.6) |
| NSAIDs, N (%) | 3,604 (38.1) | 7,785 (37.5) | 7,720 (35.9) | 7,485 (35.1) | 5,841 (34.4) | 4,882 (33.6) | 4,662 (32.8) | 3,824 (31.3) |
| Corticosteroids,  N (%) | 1,263 (13.3) | 2,709 (13.1) | 2,722 (12.6) | 2,804 (13.1) | 2,115 (12.5) | 1,980 (13.6) | 1,952 (13.7) | 1,576 (12.9) |
| Antiarrhythmic agents, N (%) | 7,099 (75.0) | 14,886 (71.8) | 14,733 (68.5) | 14,171 (66.4) | 10,690 (62.9) | 8,906 (61.3) | 8,705 (61.2) | 7,262 (59.5) |
| SSRI, N (%) | 767 (8.1) | 1,732 (8.3) | 1,805 (8.4) | 1,686 (7.9) | 1,402 (8.3) | 1,193 (8.2) | 1,131 (8.0) | 1,010 (8.3) |
| PPI, N (%) | 3,484 (36.8) | 7,361 (35.5) | 7,814 (36.3) | 7,560 (35.4) | 5,904 (34.8) | 5,141 (35.4) | 4,770 (33.6) | 3,969 (32.5) |
| **CHA2DS2VASc scoreb** | | | | | | | | |
| Mean (SD) | 3.6 (1.9) | 3.5 (1.9) | 3.5 (1.9) | 3.4 (1.9) | 3.4 (1.9) | 3.4 (1.9) | 3.4 (1.9) | 3.4 (1.9) |
| Median (Q1-Q3) | 4.0 (2-5) | 3.0 (2-5) | 3.0 (2-5) | 3.0 (2-5) | 3.0 (2-5) | 3.0 (2-5) | 3.0 (2-5) | 3.0 (2-5) |
| **Modified HAS-BLED scoreb** | | | | | | | | |
| Mean (SD) | 2.9 (1.4) | 2.8 (1.4) | 2.7 (1.4) | 2.7 (1.4) | 2.7 (1.5) | 2.8 (1.5) | 2.8 (1.5) | 2.8 (1.5) |
| Median (Q1-Q3) | 3.0 (2-4) | 3.0 (2-4) | 3.0 (2-4) | 3.0 (2-4) | 3.0 (2-4) | 3.0 (2-4) | 3.0 (2-4) | 3.0 (2-4) |

a Year 2011 only includes data from August 2011 onwards (beginning of the study period)

b Further details are described in the supplementary tables 3-4

**Abbreviations:** OAC, oral anticoagulant; IQR, Interquartile range; SD, standard deviation; TIA, transient ischemic attack; NSAID, nonsteroidal anti-inflammatory drug; PPI, proton pump inhibitor; SSRI, selective serotonin reuptake inhibitor.

**Supplementary table 5d:** Baseline characteristics of new apixaban users, stratified by year of index date

|  | **2012/13 N=2581** | **2014 N=9247** | **2015 N=16,203** | **2016 N=20,794** | **2017 N=25,475** | **2018 N=26,399** | **2019 N=29,599** |
| --- | --- | --- | --- | --- | --- | --- | --- |
| **Sex** | | | | | | | |
| Male, N (%) | 1,275 (49.4) | 4,553 (49.2) | 7,874 (48.6) | 10,131 (48.7) | 12,337 (48.4) | 12,869 (48.7) | 14,619 (49.4) |
| **Age (years)** | | | | | | | |
| Mean (SD) | 74.9 (10.6) | 74.9 (10.9) | 75.0 (11.0) | 75.1 (11.0) | 75.3 (10.9) | 75.3 (10.9) | 75.2 (11.0) |
| Median (Q1-Q3) | 75.0 (69-82) | 76.0 (69-82) | 76.0 (69-82) | 77.0 (69-82) | 77.0 (69-82) | 77.0 (69-83) | 77.0 (69-83) |
| **Age categories (years)** | | | | | | | |
| 65-74, N (%) | 793 (30.7) | 2,615 (28.3) | 4,088 (25.2) | 5,082 (24.4) | 6,178 (24.3) | 6,274 (23.8) | 6,889 (23.3) |
| 75+, N (%) | 1,414 (54.8) | 5,171 (55.9) | 9,475 (58.5) | 12,380 (59.5) | 15,410 (60.5) | 15,973 (60.5) | 17,878 (60.4) |
| **Number of hospital visits in the year prior to index date** | | | | | | | |
| Median (Q1-Q3) | 1.0 (0-2) | 1.0 (1-2) | 1.0 (1-2) | 1.0 (1-2) | 1.0 (1-2) | 1.0 (1-2) | 1.0 (1-2) |
| **Days spent in hospital in the year prior to index date** | | | | | | | |
| Median (Q1-Q3) | 7.0 (0-16) | 7.0 (1-17) | 7.0 (2-17) | 7.0 (2-18) | 7.0 (2-18) | 7.0 (2-19) | 7.0 (2-18) |
| **Look-back period in years** | | | | | | | |
| Mean (SD) | 7.9 (2.5) | 8.9 (2.5) | 9.8 (2.6) | 10.8 (2.7) | 11.6 (2.9) | 12.6 (3.0) | 13.5 (3.2) |
| Median (Q1-Q3) | 9.0 (9-9) | 10.0 (10-10) | 11.0 (11-11) | 12.0 (12-12) | 13.0 (13-13) | 14.0 (14-14) | 15.0 (15-15) |
| **Selected medical history any time before index date** | | | | | | | |
| Ischemic stroke,  N (%) | 352 (13.6) | 1,290 (14.0) | 2,067 (12.8) | 2,585 (12.4) | 3,005 (11.8) | 3,134 (11.9) | 3,395 (11.5) |
| TIA, N (%) | 153 (5.9) | 556 (6.0) | 909 (5.6) | 1,174 (5.6) | 1,349 (5.3) | 1,440 (5.5) | 1,649 (5.6) |
| Embolism, N (%) | 42 (1.6) | 122 (1.3) | 252 (1.6) | 314 (1.5) | 475 (1.9) | 490 (1.9) | 543 (1.8) |
| Coronary heart disease, N (%) | 807 (31.3) | 2,952 (31.9) | 4,996 (30.8) | 6,507 (31.3) | 7,533 (29.6) | 7,822 (29.6) | 8,569 (29.0) |
| Hypertension,  N (%) | 1,975 (76.5) | 7,028 (76.0) | 12,355 (76.3) | 15,798 (76.0) | 19,395 (76.1) | 20,017 (75.8) | 22,371 (75.6) |
| Congestive heart failure, N (%) | 474 (18.4) | 1,703 (18.4) | 2,899 (17.9) | 3,799 (18.3) | 4,628 (18.2) | 4,655 (17.6) | 5,037 (17.0) |
| Vascular disease, N (%) | 910 (35.3) | 3,352 (36.2) | 5,679 (35.0) | 7,510 (36.1) | 8,738 (34.3) | 9,266 (35.1) | 10,296 (34.8) |
| Diabetes, N (%) | 426 (16.5) | 1,651 (17.9) | 2,845 (17.6) | 3,792 (18.2) | 4,523 (17.8) | 4,734 (17.9) | 5,340 (18.0) |
| Renal disease,  N (%) | 581 (22.5) | 2,087 (22.6) | 3,736 (23.1) | 5,108 (24.6) | 6,597 (25.9) | 7,180 (27.2) | 8,060 (27.2) |
| Liver disease,  N (%) | 488 (18.9) | 1,753 (19.0) | 3,187 (19.7) | 4,238 (20.4) | 5,470 (21.5) | 5,788 (21.9) | 6,697 (22.6) |
| Major bleeding,  N (%) | 502 (19.4) | 1,883 (20.4) | 3,469 (21.4) | 4,748 (22.8) | 5,900 (23.2) | 6,338 (24.0) | 7,030 (23.8) |
| Intracranial  bleeding, N (%) | 48 (1.9) | 199 (2.2) | 353 (2.2) | 457 (2.2) | 545 (2.1) | 581 (2.2) | 668 (2.3) |
| Gastrointestinal  bleeding, N (%) | 149 (5.8) | 481 (5.2) | 918 (5.7) | 1,232 (5.9) | 1,650 (6.5) | 1,728 (6.5) | 1,890 (6.4) |
| **Selected medication dispensed within one year before index date** | | | | | | | |
| Antiplatelets,  N (%) | 590 (22.9) | 2,076 (22.5) | 3,382 (20.9) | 4,321 (20.8) | 4,878 (19.1) | 5,083 (19.3) | 5,498 (18.6) |
| NSAIDs, N (%) | 884 (34.3) | 3,187 (34.5) | 5,463 (33.7) | 7,002 (33.7) | 8,153 (32.0) | 8,309 (31.5) | 8,899 (30.1) |
| Antiarrhythmic agents, N (%) | 1,959 (75.9) | 6,567 (71.0) | 11,084 (68.4) | 13,812 (66.4) | 16,556 (65.0) | 16,669 (63.1) | 18,499 (62.5) |
| Corticosteroids,  N (%) | 298 (11.5) | 1,119 (12.1) | 2,104 (13.0) | 2,682 (12.9) | 3,370 (13.2) | 3,532 (13.4) | 4,054 (13.7) |
| SSRI, N (%) | 220 (8.5) | 832 (9.0) | 1,416 (8.7) | 1,849 (8.9) | 2,240 (8.8) | 2,356 (8.9) | 2,615 (8.8) |
| PPI, N (%) | 964 (37.3) | 3,417 (37.0) | 6,032 (37.2) | 7,883 (37.9) | 9,205 (36.1) | 9,289 (35.2) | 10,028 (33.9) |
| **CHA2DS2VASc scorea** | | | | | | | |
| Mean (SD) | 3.8 (1.9) | 3.8 (2.0) | 3.8 (1.9) | 3.9 (2.0) | 3.8 (1.9) | 3.8 (1.9) | 3.8 (1.9) |
| Median (Q1-Q3) | 4.0 (2-5) | 4.0 (3-5) | 4.0 (3-5) | 4.0 (3-5) | 4.0 (3-5) | 4.0 (3-5) | 4.0 (3-5) |
| **Modified HAS-BLED scorea** | | | | | | | |
| Mean (SD) | 2.9 (1.4) | 2.9 (1.5) | 2.9 (1.5) | 3.0 (1.5) | 3.0 (1.5) | 3.0 (1.5) | 3.0 (1.5) |
| Median (Q1-Q3) | 3.0 (2-4) | 3.0 (2-4) | 3.0 (2-4) | 3.0 (2-4) | 3.0 (2-4) | 3.0 (2-4) | 3.0 (2-4) |

a Further detail are described in the supplementary tables 3-4

**Abbreviations:** OAC, oral anticoagulant; IQR, Interquartile range; SD, standard deviation; TIA, transient ischemic attack; NSAID, nonsteroidal anti-inflammatory drug; PPI, proton pump inhibitor; SSRI, selective serotonin reuptake inhibitor.

**Supplementary table 5e:** Baseline characteristics of new edoxaban users, stratified by year of index date

|  | **2015 N=622** | **2016 N=5,116** | **2017 N=9,088** | **2018 N=10,887** | **2019 N=12,415** |
| --- | --- | --- | --- | --- | --- |
| **Sex** | | | | | |
| Male, N (%) | 324 (52.1) | 2,710 (53.0) | 4,770 (52.5) | 5,677 (52.1) | 6,534 (52.6) |
| **Age (years)** | | | | | |
| Mean (SD) | 73.2 (9.9) | 73.8 (10.5) | 74.0 (10.6) | 74.5 (10.6) | 74.4 (10.8) |
| Median (Q1-Q3) | 75.0 (68-80) | 75.0 (68-81) | 76.0 (68-81) | 76.0 (68-82) | 76.0 (68-82) |
| **Age categories (years)** | | | | | |
| 65-74, N (%) | 196 (31.5) | 1,427 (27.9) | 2,439 (26.8) | 2,809 (25.8) | 3,153 (25.4) |
| 75+, N (%) | 324 (52.1) | 2,779 (54.3) | 5,075 (55.8) | 6,275 (57.6) | 7,094 (57.1) |
| **Number of hospital visits in the year prior to index date** | | | | | |
| Median (Q1-Q3) | 1.0 (0-1) | 1.0 (0-1) | 1.0 (0-2) | 1.0 (0-2) | 1.0 (0-2) |
| **Days spent in hospital in the year prior to index date** | | | | | |
| Median (Q1-Q3) | 2.0 (0-9) | 3.0 (0-10) | 3.0 (0-10) | 3.0 (0-10) | 3.0 (0-10) |
| **Look-back period in years** | | | | | |
| Mean (SD) | 9.8 (2.6) | 10.6 (2.9) | 11.6 (3.0) | 12.5 (3.2) | 13.4 (3.3) |
| Median (Q1-Q3) | 11.0 (11-11) | 12.0 (12-12) | 13.0 (13-13) | 14.0 (14-14) | 15.0 (15-15) |
| **Selected medical history any time before index date** | | | | | |
| Ischemic stroke,  N (%) | 56 (9.0) | 413 (8.1) | 751 (8.3) | 942 (8.7) | 1,051 (8.5) |
| TIA, N (%) | 36 (5.8) | 211 (4.1) | 429 (4.7) | 522 (4.8) | 579 (4.7) |
| Embolism, N (%) | 9 (1.4) | 60 (1.2) | 118 (1.3) | 137 (1.3) | 161 (1.3) |
| Coronary heart disease, N (%) | 174 (28.0) | 1,471 (28.8) | 2,557 (28.1) | 3,013 (27.7) | 3,420 (27.5) |
| Hypertension, N (%) | 464 (74.6) | 3,837 (75.0) | 6,828 (75.1) | 8,191 (75.2) | 9,316 (75.0) |
| Congestive heart failure, N (%) | 92 (14.8) | 741 (14.5) | 1,422 (15.6) | 1,664 (15.3) | 1,954 (15.7) |
| Vascular disease,  N (%) | 186 (29.9) | 1,612 (31.5) | 2,855 (31.4) | 3,374 (31.0) | 3,993 (32.2) |
| Diabetes, N (%) | 113 (18.2) | 855 (16.7) | 1,506 (16.6) | 1,850 (17.0) | 2,150 (17.3) |
| Renal disease,  N (%) | 112 (18.0) | 1,027 (20.1) | 1,896 (20.9) | 2,540 (23.3) | 2,840 (22.9) |
| Liver disease, N (%) | 112 (18.0) | 1,032 (20.2) | 1,895 (20.9) | 2,405 (22.1) | 2,849 (22.9) |
| Major bleeding,  N (%) | 105 (16.9) | 867 (16.9) | 1,711 (18.8) | 2,084 (19.1) | 2,484 (20.0) |
| Intracranial bleeding, N (%) | 10 (1.6) | 57 (1.1) | 139 (1.5) | 158 (1.5) | 190 (1.5) |
| Gastrointestinal bleeding, N (%) | 23 (3.7) | 218 (4.3) | 404 (4.4) | 542 (5.0) | 670 (5.4) |
| **Selected medication dispensed within one year before index date** | | | | | |
| Antiplatelets, N (%) | 97 (15.6) | 928 (18.1) | 1,532 (16.9) | 1,836 (16.9) | 2,126 (17.1) |
| NSAIDs, N (%) | 203 (32.6) | 1,737 (34.0) | 2,989 (32.9) | 3,483 (32.0) | 3,757 (30.3) |
| Antiarrhythmic agents, N (%) | 434 (69.8) | 3,429 (67.0) | 6,003 (66.1) | 6,868 (63.1) | 7,753 (62.4) |
| Corticosteroids,  N (%) | 74 (11.9) | 584 (11.4) | 1,086 (11.9) | 1,406 (12.9) | 1,534 (12.4) |
| SSRI, N (%) | 43 (6.9) | 398 (7.8) | 715 (7.9) | 868 (8.0) | 1,001 (8.1) |
| PPI, N (%) | 204 (32.8) | 1,796 (35.1) | 2,999 (33.0) | 3,505 (32.2) | 3,798 (30.6) |
| **CHA2DS2VASc scorea** | | | | | |
| Mean (SD) | 3.5 (1.8) | 3.5 (1.8) | 3.6 (1.9) | 3.6 (1.8) | 3.6 (1.9) |
| Median (Q1-Q3) | 3.0 (2-5) | 3.0 (2-5) | 4.0 (2-5) | 4.0 (2-5) | 4.0 (2-5) |
| **Modified HAS-BLED scorea** | | | | | |
| Mean (SD) | 2.7 (1.4) | 2.8 (1.4) | 2.8 (1.4) | 2.8 (1.4) | 2.8 (1.4) |
| Median (Q1-Q3) | 3.0 (2-3) | 3.0 (2-4) | 3.0 (2-4) | 3.0 (2-4) | 3.0 (2-4) |

a Further detail are described in the supplementary tables 3-4.

**Abbreviations:** OAC, oral anticoagulant; IQR, Interquartile range; SD, standard deviation; TIA, transient ischemic attack; NSAID, nonsteroidal anti-inflammatory drug; PPI, proton pump inhibitor; SSRI, selective serotonin reuptake inhibitor.

**Supplementary table 6a:** Baseline comorbidities, assessed only in the year prior to index date, stratified by year of index date - phenprocoumon

|  | **2011a N=12,943** | **2012 N=27,350** | **2013 N=21,651** | **2014 N=18,423** | **2015 N=14,882** | **2016 N=10,226** | **2017 N=6,284** | **2018 N=3,675** | **2019 N=2,683** |
| --- | --- | --- | --- | --- | --- | --- | --- | --- | --- |
| **Selected medical history one year prior to index date** | | | | | | | | | |
| Ischemic stroke,  N (%) | 1,112 (8.6) | 2,437 (8.9) | 1,922 (8.9) | 1,705 (9.3) | 1,444 (9.7) | 1,040 (10.2) | 620 (9.9) | 361 (9.8) | 272 (10.1) |
| TIA, N (%) | 209 (1.6) | 438 (1.6) | 357 (1.6) | 337 (1.8) | 270 (1.8) | 173 (1.7) | 87 (1.4) | 51 (1.4) | 43 (1.6) |
| Embolism, N (%) | 118 (0.9) | 323 (1.2) | 262 (1.2) | 207 (1.1) | 176 (1.2) | 86 (0.8) | 72 (1.1) | 43 (1.2) | 39 (1.5) |
| Coronary heart disease, N (%) | 3,408 (26.3) | 7,293 (26.7) | 6,031 (27.9) | 5,198 (28.2) | 4,367 (29.3) | 2,984 (29.2) | 1,766 (28.1) | 1,049 (28.5) | 714 (26.6) |
| Hypertension,  N (%) | 8,789  (67.9) | 18,795 (68.7) | 15,101 (69.7) | 12,893 (70.0) | 10,317 (69.3) | 7,194  (70.4) | 4,419  (70.3) | 2,567  (69.9) | 1,817  (67.7) |
| Congestive heart failure, N (%) | 1,501 (11.6) | 3,314 (12.1) | 2,842 (13.1) | 2,453 (13.3) | 1,955 (13.1) | 1,514 (14.8) | 914 (14.5) | 593 (16.1) | 416 (15.5) |
| Vascular disease,  N (%) | 2,857 (22.1) | 6,368 (23.3) | 5,225 (24.1) | 4,615 (25.1) | 3,937 (26.5) | 2,750 (26.9) | 1,743 (27.7) | 1,053 (28.7) | 787 (29.3) |
| Diabetes,  N (%) | 2,063 (15.9) | 4,429 (16.2) | 3,735 (17.3) | 3,290 (17.9) | 2,707 (18.2) | 1,885 (18.4) | 1,166 (18.6) | 671 (18.3) | 475 (17.7) |
| Renal disease,  N (%) | 1,721 (13.3) | 4,117 (15.1) | 3,759 (17.4) | 3,566 (19.4) | 3,235 (21.7) | 2,418 (23.6) | 1,760 (28.0) | 1,091 (29.7) | 823 (30.7) |
| Liver disease,  N (%) | 1,528 (11.8) | 3,167 (11.6) | 2,650 (12.2) | 2,316 (12.6) | 1,916 (12.9) | 1,403 (13.7) | 856 (13.6) | 493 (13.4) | 368 (13.7) |
| Major bleeding,  N (%) | 1,146 (8.9) | 2,601 (9.5) | 2,270 (10.5) | 2,042 (11.1) | 1,832 (12.3) | 1,327 (13.0) | 1,027 (16.3) | 698 (19.0) | 607 (22.6) |
| Intracranial  bleeding, N (%) | 40 (0.3) | 123 (0.4) | 101 (0.5) | 79 (0.4) | 90 (0.6) | 39 (0.4) | 41 (0.7) | 29 (0.8) | 20 (0.7) |
| Gastrointestinal bleeding, N (%) | 191 (1.5) | 498 (1.8) | 433 (2.0) | 415 (2.3) | 362 (2.4) | 240 (2.3) | 147 (2.3) | 95 (2.6) | 73 (2.7) |
| a Year 2011 only includes data from August 2011 onwards (beginning of the study period)  **Abbreviations:** OAC, oral anticoagulant; TIA, transient ischemic attack. | | | | | | | | | |

**Supplementary table 6b:** Baseline comorbidities, assessed only in the year prior to index date stratified by year of index date - dabigatran

|  | **2011a N=2,117** | **2012 N=6,012** | **2013 N=5,956** | **2014 N=3,850** | **2015 N=2,946** | **2016 N=3,140** | **2017 N=2,702** | **2018 N=2,199** | **2019 N=1,564** |
| --- | --- | --- | --- | --- | --- | --- | --- | --- | --- |
| **Selected medical history one year prior to index date** | | | | | | | | | |
| Ischemic stroke,  N (%) | 185 (8.7) | 580 (9.6) | 555 (9.3) | 352 (9.1) | 262 (8.9) | 265 (8.4) | 288 (10.7) | 302 (13.7) | 198 (12.7) |
| TIA, N (%) | 50 (2.4) | 132 (2.2) | 126 (2.1) | 80 (2.1) | 59 (2.0) | 59 (1.9) | 61 (2.3) | 35 (1.6) | 48 (3.1) |
| Embolism, N (%) | 13 (0.6) | 15 (0.2) | 22 (0.4) | 12 (0.3) | 13 (0.4) | 13 (0.4) | 15 (0.6) | 19 (0.9) | 14 (0.9) |
| Coronary heart disease, N (%) | 545 (25.7) | 1,419 (23.6) | ,1359 (22.8) | 867 (22.5) | 703 (23.9) | 706 (22.5) | 557 (20.6) | 472 (21.5) | 309 (19.8) |
| Hypertension,  N (%) | 1,402 (66.2) | 3,782 (62.9) | 3,696 (62.1) | 2,474 (64.3) | 1,882 (63.9) | 1,976 (62.9) | 1,666 (61.7) | 1,371 (62.3) | 944 (60.4) |
| Congestive heart failure, N (%) | 249 (11.8) | 653 (10.9) | 594 (10.0) | 424 (11.0) | 277 (9.4) | 288 (9.2) | 250 (9.3) | 188 (8.5) | 118 (7.5) |
| Vascular disease,  N (%) | 468 (22.1) | 1,178 (19.6) | 1,121 (18.8) | 730 (19.0) | 559 (19.0) | 579 (18.4) | 488 (18.1) | 454 (20.6) | 287 (18.4) |
| Diabetes, N (%) | 293 (13.8) | 834 (13.9) | 770 (12.9) | 564 (14.6) | 413 (14.0) | 460 (14.6) | 385 (14.2) | 306 (13.9) | 192 (12.3) |
| Renal disease,  N (%) | 35 (1.7) | 103 (1.7) | 93 (1.6) | 68 (1.8) | 67 (2.3) | 97 (3.1) | 85 (3.1) | 86 (3.9) | 53 (3.4) |
| Liver disease,  N (%) | 247 (11.7) | 645 (10.7) | 623 (10.5) | 431 (11.2) | 329 (11.2) | 381 (12.1) | 343 (12.7) | 295 (13.4) | 184 (11.8) |
| Major bleeding,  N (%) | 174 (8.2) | 457 (7.6) | 406 (6.8) | 247 (6.4) | 191 (6.5) | 234 (7.5) | 223 (8.3) | 231 (10.5) | 169 (10.8) |
| Intracranial  bleeding, N (%) | 15 (0.7) | 56 (0.9) | 53 (0.9) | 38 (1.0) | 20 (0.7) | 55 (1.8) | 60 (2.2) | 52 (2.4) | 55 (3.5) |
| Gastrointestinal bleeding, N (%) | 44 (2.1) | 99 (1.6) | 101 (1.7) | 65 (1.7) | 55 (1.9) | 59 (1.9) | 62 (2.3) | 62 (2.8) | 36 (2.3) |

a Year 2011 only includes data from August 2011 onwards (beginning of the study period)

**Abbreviations:** OAC, oral anticoagulant; TIA, transient ischemic attack.

**Supplementary table 6c:** Baseline comorbidities, assessed only in the year prior to index date, stratified by year of index date - rivaroxaban

|  | **2011a/12 N=9,470** | **2013 N=20,745** | **2014 N=21,519** | **2015 N=21,328** | **2016 N=16,985** | **2017 N=14,535** | **2018 N=14,213** | **2019 N=12,202** |
| --- | --- | --- | --- | --- | --- | --- | --- | --- |
| **Selected medical history one year prior to index date** | | | | | | | | |
| Ischemic stroke, N (%) | 711 (7.5) | 1,277 (6.2) | 1,294 (6.0) | 1,132 (5.3) | 879 (5.2) | 732 (5.0) | 705 (5.0) | 612 (5.0) |
| TIA, N (%) | 180 (1.9) | 331 (1.6) | 340 (1.6) | 292 (1.4) | 237 (1.4) | 182 (1.3) | 188 (1.3) | 170 (1.4) |
| Embolism, N (%) | 117 (1.2) | 251 (1.2) | 239 (1.1) | 228 (1.1) | 174 (1.0) | 160 (1.1) | 163 (1.1) | 133 (1.1) |
| Coronary heart disease, N (%) | 2,294 (24.2) | 4,776 (23.0) | 4,596 (21.4) | 4,506 (21.1) | 3,527 (20.8) | 3,125 (21.5) | 3,226 (22.7) | 2,685 (22.0) |
| Hypertension,  N (%) | 6,223 (65.7) | 13,342 (64.3) | 13,840 (64.3) | 13,408 (62.9) | 10,498 (61.8) | 9,002 (61.9) | 8,833 (62.1) | 7,558 (61.9) |
| Congestive heart failure, N (%) | 1,160 (12.2) | 2,378 (11.5) | 2,325 (10.8) | 2,211 (10.4) | 1,662 (9.8) | 1,477 (10.2) | 1,370 (9.6) | 1,262 (10.3) |
| Vascular disease, N (%) | 1,975 (20.9) | 3,972 (19.1) | 3,893 (18.1) | 3,667 (17.2) | 2,919 (17.2) | 2,745 (18.9) | 2,800 (19.7) | 2,407 (19.7) |
| Diabetes, N (%) | 1,431 (15.1) | 3,058 (14.7) | 3,102 (14.4) | 2,985 (14.0) | 2,465 (14.5) | 2,174 (15.0) | 2,123 (14.9) | 1,915 (15.7) |
| Renal disease,  N (%) | 14 (13.7) | 2,683 (12.9) | 2,781 (12.9) | 2,730 (12.8) | 2,277 (13.4) | 2,176 (15.0) | 2,246 (15.8) | 2,050 (16.8) |
| Liver disease,  N (%) | 1,086 (11.5) | 2,321 (11.2) | 2,452 (11.4) | 2,393 (11.2) | 1,972 (11.6) | 1,688 (11.6) | 1,743 (12.3) | 1,534 (12.6) |
| Major bleeding,  N (%) | 850 (9.0) | 1,654 (8.0) | 1,684 (7.8) | 1,641 (7.7) | 1,324 (7.8) | 1,260 (8.7) | 1,239 (8.7) | 1,036 (8.5) |
| Intracranial bleeding, N (%) | 58 (0.6) | 131 (0.6) | 130 (0.6) | 120 (0.6) | 75 (0.4) | 68 (0.5) | 70 (0.5) | 60 (0.5) |
| Gastrointestinal bleeding, N (%) | 180 (1.9) | 368 (1.8) | 406 (1.9) | 375 (1.8) | 316 (1.9) | 290 (2.0) | 294 (2.1) | 239 (2.0) |

a Year 2011 only includes data from August 2011 onwards (beginning of the study period)

**Abbreviations:** OAC, oral anticoagulant; TIA, transient ischemic attack.

**Supplementary table 6d:** Baseline comorbidities, assessed only in the year prior to index date, stratified by year of index date - apixaban

|  | **2012/13 N=2,581** | **2014 N=9,247** | **2015 N=16,203** | **2016 N=20,794** | **2017 N=25,475** | **2018 N=26,399** | **2019 N=29,599** |
| --- | --- | --- | --- | --- | --- | --- | --- |
| **Selected medical history one year prior to index date** | | | | | | | |
| Ischemic stroke, N (%) | 257 (10.0) | 936 (10.1) | 1,464 (9.0) | 1,794 (8.6) | 1,988 (7.8) | 2,070 (7.8) | 2,202 (7.4) |
| TIA, N (%) | 55 (2.1) | 193 (2.1) | 287 (1.8) | 357 (1.7) | 388 (1.5) | 377 (1.4) | 437 (1.5) |
| Embolism, N (%) | 11 (0.4) | 45 (0.5) | 121 (0.7) | 139 (0.7) | 231 (0.9) | 257 (1.0) | 299 (1.0) |
| Coronary heart disease, N (%) | 639 (24.8) | 2,284 (24.7) | 3,908 (24.1) | 5,093 (24.5) | 5,827 (22.9) | 6,011 (22.8) | 6,564 (22.2) |
| Hypertension,  N (%) | 1,743 (67.5) | 6,161 (66.6) | 10,676 (65.9) | 13,674 (65.8) | 16,801 (66.0) | 17,235 (65.3) | 19,271 (65.1) |
| Congestive heart failure, N (%) | 339 (13.1) | 1,194 (12.9) | 2,003 (12.4) | 2,629 (12.6) | 3,109 (12.2) | 3,183 (12.1) | 3,449 (11.7) |
| Vascular disease, N (%) | 549 (21.3) | 1,941 (21.0) | 3,346 (20.7) | 4,365 (21.0) | 4,989 (19.6) | 5,329 (20.2) | 5,873 (19.8) |
| Diabetes, N (%) | 387 (15.0) | 1,505 (16.3) | 2,554 (15.8) | 3,382 (16.3) | 3,971 (15.6) | 4,168 (15.8) | 4,676 (15.8) |
| Renal disease,  N (%) | 426 (16.5) | 1,517 (16.4) | 2,695 (16.6) | 3,769 (18.1) | 4,877 (19.1) | 5,334 (20.2) | 5,916 (20.0) |
| Liver disease,  N (%) | 260 (10.1) | 1,052 (11.4) | 1,902 (11.7) | 2,452 (11.8) | 3,137 (12.3) | 3,303 (12.5) | 3,869 (13.1) |
| Major bleeding,  N (%) | 217 (8.4) | 767 (8.3) | 1,385 (8.5) | 1,909 (9.2) | 2,368 (9.3) | 2,426 (9.2) | 2,725 (9.2) |
| Intracranial  bleeding, N (%) | 28 (1.1) | 120 (1.3) | 191 (1.2) | 238 (1.1) | 291 (1.1) | 300 (1.1) | 308 (1.0) |
| Gastrointestinal  bleeding, N (%) | 54 (2.1) | 192 (2.1) | 350 (2.2) | 490 (2.4) | 609 (2.4) | 673 (2.5) | 719 (2.4) |

**Abbreviations:** OAC, oral anticoagulant; TIA, transient ischemic attack.

**Supplementary table 6e:** Baseline comorbidities, assessed only in the year prior to index date, stratified by year of index date - edoxaban

|  | **2015 N=622** | **2016 N=5,116** | **2017 N=9,088** | **2018 N=10,887** | **2019 N=12,415** | |
| --- | --- | --- | --- | --- | --- | --- |
| **Selected medical history one year prior to index date** | | | | | |
| Ischemic stroke, N (%) | 34 (5.5) | 259 (5.1) | 447 (4.9) | 553 (5.1) | 627 (5.1) | |
| TIA, N (%) | 10 (1.6) | 57 (1.1) | 123 (1.4) | 124 (1.1) | 162 (1.3) | |
| Embolism, N (%) | 3 (0.5) | 22 (0.4) | 49 (0.5) | 53 (0.5) | 61 (0.5) | |
| Coronary heart disease, N (%) | 132 (21.2) | 1,155 (22.6) | 1,969 (21.7) | 2,292 (21.1) | 2,621 (21.1) | |
| Hypertension, N (%) | 402 (64.6) | 3,354 (65.6) | 5,973 (65.7) | 7,072 (65.0) | 8,052 (64.9) | |
| Congestive heart failure, N (%) | 63 (10.1) | 497 (9.7) | 948 (10.4) | 1,166 (10.7) | 1,306 (10.5) | |
| Vascular disease, N (%) | 87 (14.0) | 879 (17.2) | 1,518 (16.7) | 1,757 (16.1) | 2,083 (16.8) | |
| Diabetes, N (%) | 103 (16.6) | 773 (15.1) | 1,354 (14.9) | 1,647 (15.1) | 1,881 (15.2) | |
| Renal disease, N (%) | 70 (11.3) | 719 (14.1) | 1,347 (14.8) | 1,847 (17.0) | 2,022 (16.3) | |
| Liver disease, N (%) | 65 (10.5) | 635 (12.4) | 1,078 (11.9) | 1,352 (12.4) | 1,672 (13.5) | |
| Major bleeding, N (%) | 31 (5.0) | 245 (4.8) | 479 (5.3) | 608 (5.6) | 709 (5.7) | |
| Intracranial bleeding, N (%) | 5 (0.8) | 21 (0.4) | 44 (0.5) | 57 (0.5) | 52 (0.4) | |
| Gastrointestinal bleeding, N (%) | 4 (0.6) | 70 (1.4) | 109 (1.2) | 169 (1.6) | 202 (1.6) | |

**Abbreviations:** OAC, oral anticoagulant; TIA, transient ischemic attack.
